# Supplementary material for: Comprehensive Analysis of Aneuploidy Status and Its Effect on Efficacy of EGFR-TKIs in Lung Cancer
Source: Research Square preprint supplement (doi:10.21203/rs.3.rs-845098/v1), 2021-09-07
Supplement: Supplementary file 1 [file e82c38e71b6523e5ac639419.docx]

**Supplementary Table 1** The median PFS based on EGFR mutation abundance.

| **EGFR mutation abundance** | **Cases (n)** | **Median PFS (m)** | **HR (95%Cl)** | **P-value** |
| --- | --- | --- | --- | --- |
| < 10% | 9 | 9 | 1 | 0.49 |
| ≥ 10% | 54 | 10 | 1.29(0.63-2.65) |
| < 20% | 21 | 9 | 1 | 0.85 |
| ≥ 20% | 42 | 10 | 1.06(0.61-1.84) |
| < 30% | 34 | 9 | 1 | 0.35 |
| ≥ 30% | 29 | 11 | 0.78(0.46-1.32) |
| < 40% | 50 | 10 | 1 | 0.87 |
| ≥ 40% | 13 | 10 | 0.95(0.50-1.80) |
| < 50% | 54 | 10 | 1 | 0.98 |
| ≥ 50% | 9 | 9 | 1.01(0.47-2.11) |
| < 25% | 27 | 8 | 1 | 0.59 |
| ≥ 25% | 36 | 11 | 0.86(0.50-1.48) |
